# Supplementary material
Source: Springer Nature journal article supplement (https://www.springermedizin.de/resource/supplementary/12889_2014_7132_MOESM8_ESM.pdf/9496906)

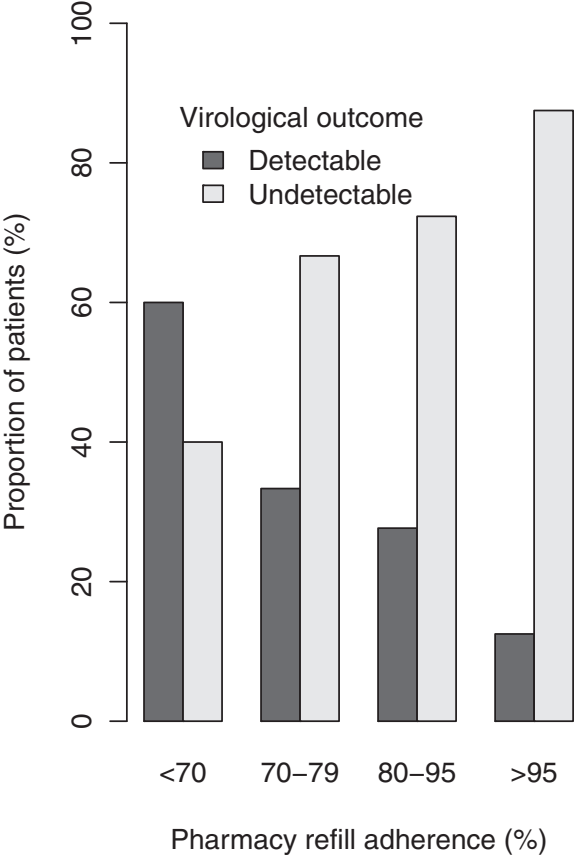

Supplement: MOESM8 [file 9496906]
